# Supplementary material for: Silver, Gold, and Iron Oxide Nanoparticles Alter miRNA Expression but Do Not Affect DNA Methylation in HepG2 Cells
Source: PubMed Central journal article supplement (PMC6479689; doi:10.3390/ma12071038), 2019-03-29
Supplement: materials-12-01038-s001.pdf [file materials-12-01038-s001.pdf]

**Supplementary Table 1.** Analysis of miRNA expression in HepG2 cells treated with AgNPs (10 µg/mL), AuNPs (10 µg/mL), and SPIONs (5 µg/mL) for 24 h. Mean fold changes from three independent experiments. *p* values <0.05 are marked in red.

| Target Name     | AgNPs       |                         | AuNPs       |                         | SPIONs      |                         |
|-----------------|-------------|-------------------------|-------------|-------------------------|-------------|-------------------------|
|                 | Fold Change | <i>p</i> value (t-test) | Fold Change | <i>p</i> value (t-test) | Fold Change | <i>p</i> value (t-test) |
| hsa-let-7a-5p   | 1.023       | 0.679                   | 1.032       | 0.263                   | 0.986       | 0.857                   |
| hsa-let-7b-5p   | 0.837       | 0.589                   | 0.853       | 0.249                   | 1.376       | 0.143                   |
| hsa-let-7c-5p   | 1.047       | 0.833                   | 1.038       | 0.625                   | 1.021       | 0.803                   |
| hsa-let-7d-5p   | 1.123       | 0.190                   | 1.170       | 0.282                   | 0.967       | 0.794                   |
| hsa-let-7e-5p   | 0.936       | 0.409                   | 0.963       | 0.529                   | 0.856       | 0.317                   |
| hsa-let-7f-5p   | 0.987       | 0.732                   | 1.020       | 0.715                   | 0.951       | 0.712                   |
| hsa-let-7g-5p   | 0.988       | 0.870                   | 1.052       | 0.456                   | 0.981       | 0.875                   |
| hsa-let-7i-5p   | 0.942       | 0.641                   | 0.955       | 0.545                   | 0.825       | 0.094                   |
| hsa-miR-101-3p  | 0.979       | 0.824                   | 0.943       | 0.539                   | 0.995       | 0.957                   |
| hsa-miR-106b-5p | 0.952       | 0.598                   | 0.964       | 0.656                   | 0.963       | 0.619                   |
| hsa-miR-122-5p  | 0.847       | 0.021                   | 0.903       | 0.351                   | 0.991       | 0.922                   |
| hsa-miR-125a-5p | 0.992       | 0.955                   | 1.037       | 0.840                   | 0.970       | 0.853                   |
| hsa-miR-125b-5p | 0.941       | 0.722                   | 1.053       | 0.687                   | 0.883       | 0.588                   |
| hsa-miR-128-3p  | 0.950       | 0.564                   | 0.998       | 0.975                   | 0.943       | 0.368                   |
| hsa-miR-1285-3p | 1.418       | 0.152                   | 1.424       | 0.048                   | 1.284       | 0.166                   |
| hsa-miR-130a-3p | 0.878       | 0.417                   | 1.031       | 0.893                   | 1.077       | 0.578                   |
| hsa-miR-130b-3p | 0.846       | 0.172                   | 0.953       | 0.648                   | 0.933       | 0.525                   |
| hsa-miR-1324    | 0.866       | 0.506                   | 0.832       | 0.446                   | 1.604       | 0.416                   |
| hsa-miR-133a-3p | 0.619       | 0.565                   | 0.850       | 0.828                   | 0.751       | 0.725                   |
| hsa-miR-133b    | 0.383       | 0.325                   | 1.165       | 0.899                   | 0.613       | 0.579                   |
| hsa-miR-134-5p  | 0.851       | 0.540                   | 0.919       | 0.839                   | 0.923       | 0.758                   |
| hsa-miR-1-3p    | 1.650       | 0.043                   | 1.534       | 0.240                   | 1.511       | 0.012                   |
| hsa-miR-141-3p  | 1.070       | 0.672                   | 0.977       | 0.913                   | 0.887       | 0.500                   |
| hsa-miR-143-3p  | 1.025       | 0.663                   | 1.164       | 0.182                   | 1.063       | 0.485                   |
| hsa-miR-144-3p  | 2.004       | 0.244                   | 2.007       | 0.311                   | 2.133       | 0.342                   |
| hsa-miR-145-5p  | 0.930       | 0.294                   | 1.006       | 0.912                   | 0.958       | 0.270                   |
| hsa-miR-146a-5p | 0.968       | 0.224                   | 1.029       | 0.722                   | 0.955       | 0.178                   |
| hsa-miR-149-3p  | 0.939       | 0.741                   | 0.936       | 0.717                   | 0.996       | 0.981                   |
| hsa-miR-153-3p  | 0.952       | 0.584                   | 0.998       | 0.983                   | 0.829       | 0.109                   |
| hsa-miR-15a-5p  | 0.926       | 0.576                   | 0.993       | 0.945                   | 1.030       | 0.753                   |
| hsa-miR-15b-5p  | 1.058       | 0.155                   | 1.100       | 0.047                   | 0.980       | 0.745                   |
| hsa-miR-16-5p   | 0.959       | 0.516                   | 1.003       | 0.950                   | 0.954       | 0.455                   |
| hsa-miR-17-5p   | 0.979       | 0.752                   | 1.016       | 0.775                   | 0.953       | 0.546                   |
| hsa-miR-181a-5p | 0.910       | 0.664                   | 1.029       | 0.760                   | 1.127       | 0.267                   |
| hsa-miR-181b-5p | 1.076       | 0.528                   | 1.009       | 0.936                   | 0.962       | 0.712                   |
| hsa-miR-181c-5p | 0.916       | 0.364                   | 1.025       | 0.819                   | 0.992       | 0.956                   |
| hsa-miR-181d-5p | 1.153       | 0.410                   | 1.050       | 0.775                   | 0.971       | 0.841                   |
| hsa-miR-183-5p  | 1.104       | 0.243                   | 1.060       | 0.275                   | 0.941       | 0.474                   |
| hsa-miR-185-5p  | 0.944       | 0.238                   | 1.012       | 0.766                   | 1.012       | 0.860                   |

|                 |       |       |       |       |       |       |
|-----------------|-------|-------|-------|-------|-------|-------|
| hsa-miR-186-3p  | 1.196 | 0.894 | 0.639 | 0.702 | 3.105 | 0.333 |
| hsa-miR-186-5p  | 0.871 | 0.263 | 0.959 | 0.579 | 0.894 | 0.192 |
| hsa-miR-192-5p  | 0.959 | 0.670 | 1.036 | 0.548 | 0.998 | 0.981 |
| hsa-miR-193a-5p | 0.937 | 0.783 | 1.097 | 0.547 | 0.935 | 0.369 |
| hsa-miR-193b-3p | 0.949 | 0.594 | 0.883 | 0.209 | 0.996 | 0.966 |
| hsa-miR-194-5p  | 0.938 | 0.354 | 1.039 | 0.415 | 0.949 | 0.482 |
| hsa-miR-195-5p  | 1.007 | 0.908 | 1.027 | 0.712 | 0.970 | 0.687 |
| hsa-miR-19a-3p  | 0.921 | 0.406 | 0.929 | 0.436 | 0.897 | 0.229 |
| hsa-miR-19b-3p  | 0.914 | 0.258 | 0.924 | 0.333 | 0.905 | 0.216 |
| hsa-miR-200c-3p | 1.013 | 0.792 | 1.064 | 0.267 | 0.931 | 0.468 |
| hsa-miR-202-3p  | 1.989 | 0.374 | 1.913 | 0.419 | 1.514 | 0.604 |
| hsa-miR-203a-3p | 7.356 | 0.106 | 0.910 | 0.929 | 1.382 | 0.764 |
| hsa-miR-204-5p  | 1.239 | 0.260 | 1.313 | 0.122 | 1.045 | 0.733 |
| hsa-miR-205-5p  | 3.290 | 0.255 | 3.510 | 0.234 | 4.039 | 0.199 |
| hsa-miR-206     | 0.640 | 0.471 | 0.735 | 0.608 | 0.584 | 0.398 |
| hsa-miR-20a-5p  | 0.962 | 0.620 | 0.991 | 0.895 | 0.949 | 0.462 |
| hsa-miR-20b-5p  | 0.923 | 0.465 | 0.958 | 0.655 | 0.910 | 0.363 |
| hsa-miR-210-3p  | 0.892 | 0.367 | 0.959 | 0.692 | 0.978 | 0.849 |
| hsa-miR-211-5p  | 0.652 | 0.424 | 0.680 | 0.466 | 1.084 | 0.926 |
| hsa-miR-212-3p  | 2.735 | 0.041 | 1.588 | 0.233 | 1.100 | 0.885 |
| hsa-miR-214-3p  | 1.818 | 0.059 | 1.296 | 0.672 | 1.484 | 0.329 |
| hsa-miR-21-5p   | 1.035 | 0.710 | 1.013 | 0.900 | 0.961 | 0.684 |
| hsa-miR-218-5p  | 0.826 | 0.390 | 1.114 | 0.426 | 0.851 | 0.274 |
| hsa-miR-221-3p  | 0.992 | 0.886 | 1.020 | 0.741 | 0.969 | 0.549 |
| hsa-miR-222-3p  | 0.966 | 0.602 | 0.966 | 0.699 | 0.939 | 0.455 |
| hsa-miR-23a-3p  | 1.161 | 0.464 | 1.041 | 0.835 | 0.956 | 0.815 |
| hsa-miR-23b-3p  | 0.964 | 0.479 | 0.984 | 0.800 | 0.891 | 0.191 |
| hsa-miR-24-3p   | 1.029 | 0.665 | 1.031 | 0.638 | 0.970 | 0.624 |
| hsa-miR-25-3p   | 1.007 | 0.857 | 1.057 | 0.332 | 0.935 | 0.573 |
| hsa-miR-26a-5p  | 0.989 | 0.593 | 1.044 | 0.047 | 0.950 | 0.480 |
| hsa-miR-26b-5p  | 1.054 | 0.160 | 1.102 | 0.123 | 0.952 | 0.695 |
| hsa-miR-27a-3p  | 1.090 | 0.617 | 0.994 | 0.972 | 0.956 | 0.790 |
| hsa-miR-29a-3p  | 1.000 | 0.998 | 1.021 | 0.888 | 1.021 | 0.870 |
| hsa-miR-29b-3p  | 1.065 | 0.484 | 0.985 | 0.729 | 1.027 | 0.787 |
| hsa-miR-29c-3p  | 1.030 | 0.823 | 1.048 | 0.739 | 1.042 | 0.752 |
| hsa-miR-300     | 0.793 | 0.705 | 1.769 | 0.437 | 0.511 | 0.304 |
| hsa-miR-301a-3p | 0.971 | 0.541 | 0.971 | 0.482 | 0.967 | 0.425 |
| hsa-miR-301b-3p | 1.009 | 0.888 | 0.958 | 0.534 | 0.943 | 0.358 |
| hsa-miR-302a-3p | 0.524 | 0.463 | 2.037 | 0.201 | 0.847 | 0.712 |
| hsa-miR-302b-3p | 0.653 | 0.577 | 0.627 | 0.547 | 0.573 | 0.479 |
| hsa-miR-302c-3p | 5.903 | 0.112 | 1.773 | 0.471 | 1.016 | 0.981 |
| hsa-miR-30a-5p  | 0.991 | 0.810 | 0.999 | 0.969 | 0.954 | 0.499 |
| hsa-miR-30b-5p  | 0.973 | 0.711 | 0.977 | 0.596 | 0.932 | 0.424 |
| hsa-miR-30c-5p  | 0.961 | 0.675 | 1.049 | 0.542 | 0.962 | 0.725 |
| hsa-miR-30d-5p  | 1.010 | 0.786 | 1.007 | 0.803 | 0.950 | 0.505 |

|                 |       |       |       |       |       |       |
|-----------------|-------|-------|-------|-------|-------|-------|
| hsa-miR-30e-5p  | 1.006 | 0.941 | 0.989 | 0.863 | 0.973 | 0.717 |
| hsa-miR-31-5p   | 1.558 | 0.398 | 0.658 | 0.313 | 1.122 | 0.784 |
| hsa-miR-32-5p   | 0.974 | 0.923 | 1.084 | 0.732 | 1.145 | 0.569 |
| hsa-miR-338-3p  | 0.955 | 0.825 | 0.958 | 0.819 | 0.992 | 0.968 |
| hsa-miR-340-5p  | 0.975 | 0.744 | 1.031 | 0.619 | 0.887 | 0.190 |
| hsa-miR-34a-5p  | 0.901 | 0.034 | 0.959 | 0.361 | 0.984 | 0.667 |
| hsa-miR-34c-5p  | 1.621 | 0.611 | 2.481 | 0.294 | 2.201 | 0.286 |
| hsa-miR-365a-3p | 1.047 | 0.040 | 0.993 | 0.758 | 0.919 | 0.249 |
| hsa-miR-372-3p  | 0.777 | 0.703 | 1.785 | 0.138 | 1.193 | 0.491 |
| hsa-miR-373-3p  | 1.623 | 0.487 | 0.570 | 0.615 | 2.020 | 0.277 |
| hsa-miR-374a-5p | 1.054 | 0.468 | 1.104 | 0.251 | 0.920 | 0.408 |
| hsa-miR-378a-3p | 0.860 | 0.074 | 0.964 | 0.682 | 0.907 | 0.173 |
| hsa-miR-381-3p  | 1.905 | 0.061 | 1.863 | 0.240 | 0.821 | 0.782 |
| hsa-miR-409-3p  | 0.652 | 0.378 | 0.689 | 0.613 | 0.782 | 0.557 |
| hsa-miR-410-3p  | 0.916 | 0.811 | 0.716 | 0.441 | 0.630 | 0.185 |
| hsa-miR-424-5p  | 1.627 | 0.652 | 0.893 | 0.899 | 2.457 | 0.314 |
| hsa-miR-449a    | 0.882 | 0.049 | 0.846 | 0.016 | 0.937 | 0.485 |
| hsa-miR-449b-5p | 0.732 | 0.219 | 1.245 | 0.415 | 0.392 | 0.192 |
| hsa-miR-451a    | 0.613 | 0.139 | 0.959 | 0.859 | 1.092 | 0.775 |
| hsa-miR-454-3p  | 0.946 | 0.284 | 0.964 | 0.557 | 0.899 | 0.256 |
| hsa-miR-491-5p  | 0.881 | 0.118 | 0.680 | 0.040 | 0.746 | 0.035 |
| hsa-miR-497-5p  | 0.919 | 0.539 | 0.784 | 0.117 | 0.649 | 0.067 |
| hsa-miR-511-5p  | 0.701 | 0.606 | 0.686 | 0.430 | 0.980 | 0.971 |
| hsa-miR-512-5p  | 0.577 | 0.571 | 0.888 | 0.931 | 3.841 | 0.214 |
| hsa-miR-513b-5p | 1.442 | 0.294 | 1.273 | 0.496 | 1.592 | 0.437 |
| hsa-miR-519c-3p | 1.254 | 0.796 | 0.917 | 0.896 | 0.510 | 0.304 |
| hsa-miR-519d-3p | 0.392 | 0.268 | 0.283 | 0.156 | 0.296 | 0.170 |
| hsa-miR-520d-3p | 0.691 | 0.683 | 0.800 | 0.541 | 0.963 | 0.930 |
| hsa-miR-520e    | 4.069 | 0.247 | 2.041 | 0.364 | 2.425 | 0.254 |
| hsa-miR-524-5p  | 0.721 | 0.617 | 1.073 | 0.938 | 2.584 | 0.194 |
| hsa-miR-542-3p  | 0.666 | 0.551 | 1.857 | 0.281 | 1.209 | 0.811 |
| hsa-miR-543     | 1.739 | 0.552 | 0.877 | 0.866 | 0.954 | 0.844 |
| hsa-miR-545-3p  | 1.396 | 0.130 | 0.754 | 0.259 | 1.293 | 0.176 |
| hsa-miR-548c-3p | 0.486 | 0.199 | 0.600 | 0.501 | 0.871 | 0.722 |
| hsa-miR-548d-3p | 0.774 | 0.231 | 0.989 | 0.904 | 0.862 | 0.185 |
| hsa-miR-548e-3p | 0.856 | 0.427 | 0.806 | 0.286 | 0.843 | 0.440 |
| hsa-miR-590-5p  | 0.988 | 0.890 | 0.911 | 0.375 | 0.966 | 0.676 |
| hsa-miR-607     | 1.197 | 0.514 | 1.149 | 0.626 | 1.951 | 0.409 |
| hsa-miR-655-3p  | 1.116 | 0.899 | 0.713 | 0.550 | 0.526 | 0.292 |
| hsa-miR-656-3p  | 0.742 | 0.041 | 0.810 | 0.340 | 0.811 | 0.286 |
| hsa-miR-708-5p  | 2.784 | 0.375 | 3.136 | 0.312 | 4.198 | 0.226 |
| hsa-miR-7-5p    | 1.070 | 0.283 | 0.999 | 0.989 | 0.965 | 0.765 |
| hsa-miR-875-3p  | 1.569 | 0.266 | 2.062 | 0.313 | 0.865 | 0.791 |
| hsa-miR-92a-3p  | 1.003 | 0.926 | 1.038 | 0.333 | 0.973 | 0.566 |
| hsa-miR-93-5p   | 0.973 | 0.645 | 1.006 | 0.927 | 0.973 | 0.357 |

|               |       |       |       |       |       |       |
|---------------|-------|-------|-------|-------|-------|-------|
| hsa-miR-9-5p  | 3.979 | 0.252 | 1.196 | 0.859 | 1.166 | 0.878 |
| hsa-miR-98-5p | 0.911 | 0.405 | 1.056 | 0.613 | 1.033 | 0.851 |
